# Supplementary material for: Ticagrelor-Pretreated Cardiomyocyte Derived Exosomes Provide Cardioprotection Under Hyperglycemia Through Alleviation In Oxidative Stress, Apoptosis, And ER-Stress
Source: Research Square preprint supplement (doi:10.21203/rs.3.rs-958741/v1), 2021-10-25
Supplement: Supplementary file 1 [file 3aa0ff563454eb426bdbbcfb.docx]

**Supplementary Table 1: The forward primers designed for miRNA-qRT-PCR.**

| **Names of miRNAs** | **Forward Primers** |
| --- | --- |
| miR-499-5p | 5’ - GAT TAA TTA AGA CTT GCA GTG CA -3’ |
| miR-133a-5p | 5’ - GAT GAG AGC TGG TAA AAT GG -3’ |
| miR-133b-5p | 5’ - TAA TAA GCT GGT CAA ACG GA -3’ |
