# Supplementary material for: Ticagrelor-Pretreated Cardiomyocyte Derived Exosomes Provide Cardioprotection Under Hyperglycemia Through Alleviation In Oxidative Stress, Apoptosis, And ER-Stress
Source: Research Square preprint supplement (doi:10.21203/rs.3.rs-958741/v1), 2021-10-25
Supplement: Supplementary file 3 [file a77b67a6be587194da560e21.docx]

Supplementary Table 2: The stem-loop primers designed for miRNA-qRT-PCR.

| **Names of miRNAs** | **Stem-loop primers** |
| --- | --- |
| miR-499-5p | 5′- GTC GTA TCC AGT GCA GGG TCC GAG GTA TTC GCA CTG GAT ACG AC AAA CAT CAC TG- 3’ |
| miR-133a-5p | 5′- GTC GTA TCC AGT GCA GGG TCC GAG GTA TTC GCA CTG GAT ACG AC ATT TGG TTC- 3’ |
| miR.-133b-5p | 5′- GTC GTA TCC AGT GCA GGG TCC GAG GTA TTC GCA CTG GAT ACG AC ACT TGG TTC- 3’ |
